# Supplementary material for: A novel broadband Ba3Ca4(BO3)3(SiO4)Cl:Mn4+ near-infrared phosphor with a special pseudo-octahedral Mn4+ coordination structure
Source: Royal Society of Chemistry journal article supplement (doi:10.1039/d3dt02602g), 2023-01-01
Supplement: d3dt02602g1.pdf [file d3dt02602g1.pdf]

## Supporting Information

# **A novel broadband $\text{Ba}_3\text{Ca}_4(\text{BO}_3)_3(\text{SiO}_4)\text{Cl}:\text{Mn}^{4+}$ near-infrared phosphor with special pseudo-octahedron $\text{Mn}^{4+}$ coordination structure**

Jiutian Wang,<sup>a,b</sup> Tao Tan,<sup>a,b</sup> Ran Pang,<sup>a</sup> Da Li,<sup>a</sup> Chengyu Li,<sup>a,b</sup> Su Zhang,<sup>a,b,\*</sup> Lihong Jiang,<sup>a,\*</sup> and Hongjie Zhang<sup>a</sup>

<sup>a</sup> *State Key Laboratory of Rare Earth Resource Utilization, Changchun Institute of Applied Chemistry, Chinese Academy of Sciences, Changchun 130022, China*

<sup>b</sup> *School of Applied Chemistry and Engineering, University of Science and Technology of China, Hefei 230026, China*

\* Corresponding authors.

*E-mail addresses:*

lhjiang@ciac.ac.cn (Lihong Jiang),

suzhang@ciac.ac.cn (Su Zhang).

Number of pages: 20

Number of figures: 6

Number of tables: 8

**Table S1.** Luminescent properties of BCBSC:0.01Mn<sup>4+</sup> phosphor and some reported Mn<sup>4+</sup>-doped oxide phosphors in recent years.

| Host                                                                                  | Emission range (nm) | Emission peak (nm)    | FWHM (nm) | IQE (%) | Ref.      |
|---------------------------------------------------------------------------------------|---------------------|-----------------------|-----------|---------|-----------|
| Ba <sub>3</sub> Ca <sub>4</sub> (BO <sub>3</sub> ) <sub>3</sub> (SiO <sub>4</sub> )Cl | 650-1100            | ~765                  | ~90       | 69.7    | This work |
| Li <sub>3</sub> Mg <sub>2</sub> NbO <sub>6</sub>                                      | 600-780             | ~670                  | ~50       | 28.6    | [1]       |
| Gd <sub>2</sub> ZnTiO <sub>6</sub>                                                    | 650-720             | 670, 685, 690 and 704 | <50       | –       | [2]       |
| Li <sub>2</sub> MgTiO <sub>4</sub>                                                    | 630-850             | ~676                  | ~46       | 32      | [3]       |
| Na <sub>4</sub> Mg(WO <sub>4</sub> ) <sub>3</sub>                                     | 560-850             | 682                   | –         | –       | [4]       |
| BaLaMgNbO <sub>6</sub>                                                                | 650-800             | 700                   | ~36       | 52      | [5]       |
| SrGdAlO <sub>4</sub>                                                                  | 650-800             | 709 and 725           | <40       | 23      | [6]       |
| NaLaMgWO <sub>6</sub>                                                                 | 650-800             | ~700                  | ~38       | 60      | [7]       |

**Table S2.** Valences and effective ionic radius for related ions.<sup>8</sup>

| Ion              | Valences | CN | IR (Å) |
|------------------|----------|----|--------|
| Mn <sup>4+</sup> | 4        | 6  | 0.53   |
| Ba <sup>2+</sup> | 2        | 11 | 1.57   |
| Ca <sup>2+</sup> | 2        | 9  | 1.18   |
|                  |          | 10 | 1.23   |
| Si <sup>4+</sup> | 4        | 4  | 0.26   |
| B <sup>3+</sup>  | 3        | 3  | 0.01   |

CN: Coordination number; IR: Effective ionic radius.

**Table S3.** Atomic positions of BCBSC.

| Atom | Site | x      | y      | z       | Occupancy | U <sub>iso</sub> |
|------|------|--------|--------|---------|-----------|------------------|
| Ba1  | 12d  | 0.1476 | 0.2953 | 0.3479  | 1.0000    | 0.0125           |
| Ca1  | 6c   | 0.4764 | 0.5235 | -0.0054 | 1.0000    | 0.0125           |
| Ca2  | 2b   | 0.3333 | 0.6667 | 0.6247  | 1.0000    | 0.0166           |
| Si1  | 2b   | 0.3333 | 0.6667 | 0.2094  | 1.0000    | 0.028            |
| B1   | 6c   | 0.8063 | 0.6125 | 0.2927  | 1.0000    | 0.0114           |
| C11  | 2a   | 0      | 0      | 0.1203  | 1.0000    | 0.0195           |
| O1   | 2b   | 0.3333 | 0.6667 | -0.028  | 1.0000    | 0.0259           |
| O2   | 12d  | 0.6825 | 0.5842 | 0.1971  | 1.0000    | 0.0213           |
| O3   | 6c   | 0.4146 | 0.8291 | 0.3018  | 1.0000    | 0.0177           |
| O4   | 6c   | 0.8355 | 0.6711 | 0.4699  | 1.0000    | 0.0410           |

**Table S4.** Bond length (Å) and O-Ca1-O bond angle (°) of BCBSC and BCBSC:0.1Mn<sup>4+</sup>.

| BCBSC       |             |            |            | BCBSC:0.1Mn <sup>4+</sup> |             |            |            |
|-------------|-------------|------------|------------|---------------------------|-------------|------------|------------|
| Bond length |             | Bond angle |            | Bond length               |             | Bond angle |            |
| Ba1-Cl1     | 3.15198(10) | O1-Ca1-O2  | 126.480(1) | Ba1-Cl1                   | 3.15284(9)  | O1-Ca1-O2  | 126.481(0) |
| Ba1-Cl1     | 3.31221(10) | O1-Ca1-O2  | 76.441(0)  | Ba1-Cl1                   | 3.31308(9)  | O1-Ca1-O2  | 76.441(0)  |
| Ba1-O2      | 2.87748(9)  | O1-Ca1-O2  | 126.509(1) | Ba1-O2                    | 2.87812(8)  | O1-Ca1-O2  | 126.510(0) |
| Ba1-O2      | 2.95102(10) | O1-Ca1-O2  | 76.431(0)  | Ba1-O2                    | 2.95185(10) | O1-Ca1-O2  | 76.431(0)  |
| Ba1-O2      | 2.95202(10) | O1-Ca1-O3  | 143.803(2) | Ba1-O2                    | 2.95286(10) | O1-Ca1-O3  | 143.807(2) |
| Ba1-O2      | 2.87704(9)  | O1-Ca1-O3  | 64.446(2)  | Ba1-O2                    | 2.87768(8)  | O1-Ca1-O3  | 64.443(1)  |
| Ba1-O3      | 3.01498(12) | O2-Ca1-O2  | 154.625(0) | Ba1-O3                    | 3.01587(11) | O2-Ca1-O2  | 154.625(0) |
| Ba1-O3      | 3.01438(12) | O2-Ca1-O2  | 73.147(2)  | Ba1-O3                    | 3.01527(11) | O2-Ca1-O2  | 73.150(1)  |
| Ba1-O4      | 3.03131(11) | O2-Ca1-O2  | 103.128(2) | Ba1-O4                    | 3.03219(10) | O2-Ca1-O2  | 103.124(2) |
| Ba1-O4      | 2.58928(11) | O2-Ca1-O3  | 80.706(2)  | Ba1-O4                    | 2.58977(10) | O2-Ca1-O3  | 80.702(2)  |
| Ba1-O4      | 3.02953(11) | O2-Ca1-O3  | 76.686(3)  | Ba1-O4                    | 3.03041(10) | O2-Ca1-O3  | 76.691(2)  |
| Ca1-O1      | 2.66661(11) | O2-Ca1-O2  | 103.165(2) | Ca1-O1                    | 2.66740(10) | O2-Ca1-O2  | 103.160(2) |
| Ca1-O2      | 2.40386(7)  | O2-Ca1-O2  | 69.129(3)  | Ca1-O2                    | 2.40323(7)  | O2-Ca1-O2  | 69.135(3)  |
| Ca1-O2      | 2.52421(3)  | O2-Ca1-O3  | 73.937(2)  | Ca1-O2                    | 2.52339(8)  | O2-Ca1-O3  | 73.941(2)  |
| Ca1-O2      | 2.40331(3)  | O2-Ca1-O3  | 127.667(2) | Ca1-O2                    | 2.40259(7)  | O2-Ca1-O3  | 127.663(2) |
| Ca1-O2      | 2.52458(7)  | O2-Ca1-O2  | 154.628(0) | Ca1-O2                    | 2.52400(8)  | O2-Ca1-O2  | 154.628(0) |
| Ca1-O3      | 2.41448(3)  | O2-Ca1-O3  | 80.735(2)  | Ca1-O3                    | 2.41409(7)  | O2-Ca1-O3  | 80.730(2)  |
| Ca1-O3      | 2.38563(4)  | O2-Ca1-O3  | 76.682(3)  | Ca1-O3                    | 2.38512(8)  | O2-Ca1-O3  | 76.687(2)  |
| Ca1-O4      | 2.93457(12) | O2-Ca1-O3  | 73.911(2)  | Ca1-O4                    | 2.93545(4)  | O2-Ca1-O3  | 73.915(2)  |
| Ca1-O4      | 2.93629(4)  | O2-Ca1-O3  | 127.656(2) | Ca1-O4                    | 2.93728(11) | O2-Ca1-O3  | 127.652(2) |
| Ca2-O1      | 2.36160(10) | O3-Ca1-O3  | 151.751(0) | Ca2-O1                    | 2.36205(9)  | O3-Ca1-O3  | 151.751(0) |
| Ca2-O2      | 2.65815(10) |            |            | Ca2-O2                    | 2.65893(9)  |            |            |
| Ca2-O2      | 2.65920(10) |            |            | Ca2-O2                    | 2.65998(9)  |            |            |
| Ca2-O2      | 2.65873(10) |            |            | Ca2-O2                    | 2.65951(9)  |            |            |
| Ca2-O2      | 2.65815(10) |            |            | Ca2-O2                    | 2.65893(9)  |            |            |
| Ca2-O2      | 2.65873(10) |            |            | Ca2-O2                    | 2.65951(9)  |            |            |
| Ca2-O2      | 2.65920(10) |            |            | Ca2-O2                    | 2.65998(9)  |            |            |
| Ca2-O3      | 2.66484(9)  |            |            | Ca2-O3                    | 2.66544(8)  |            |            |
| Ca2-O3      | 2.66484(9)  |            |            | Ca2-O3                    | 2.66544(8)  |            |            |
| Ca2-O3      | 2.66537(9)  |            |            | Ca2-O3                    | 2.66597(8)  |            |            |
| Si1-O1      | 1.61429(7)  |            |            | Si1-O1                    | 1.61460(6)  |            |            |
| Si1-O3      | 1.63558(6)  |            |            | Si1-O3                    | 1.63604(5)  |            |            |
| Si1-O3      | 1.63558(6)  |            |            | Si1-O3                    | 1.63604(5)  |            |            |
| Si1-O3      | 1.63644(6)  |            |            | Si1-O3                    | 1.63690(5)  |            |            |
| B1-O2       | 1.37037(4)  |            |            | B1-O2                     | 1.37074(4)  |            |            |
| B1-O2       | 1.36945(4)  |            |            | B1-O2                     | 1.36982(4)  |            |            |
| B1-O4       | 1.32242(5)  |            |            | B1-O4                     | 1.32269(4)  |            |            |

**Table S5.** Polyhedral distortion indices in different Mn<sup>4+</sup>-activated hosts.

| Host                                                                                  | Space group                                     | $\langle\lambda\rangle$ | $\sigma^2$ | Ref.      |
|---------------------------------------------------------------------------------------|-------------------------------------------------|-------------------------|------------|-----------|
| Ba <sub>3</sub> Ca <sub>4</sub> (BO <sub>3</sub> ) <sub>3</sub> (SiO <sub>4</sub> )Cl | Hexagonal <i>P6<sub>3</sub>mc</i>               | 1.12                    | 449.48     | This work |
| Na <sub>2</sub> WO <sub>2</sub> F <sub>4</sub>                                        | Orthorhombic <i>C<sub>2v</sub>-pbcn</i>         | 1.02485                 | 78.5316    | [9]       |
| Rb <sub>2</sub> GeF <sub>6</sub>                                                      | Hexagonal <i>C<sub>3</sub>-p6<sub>3</sub>mc</i> | 1.00340                 | 35.3698    | [10]      |
| K <sub>2</sub> SiF <sub>6</sub>                                                       | Cubic <i>O<sub>h</sub>-Fm<sub>3</sub>m</i>      | 1.00000                 | 0.0000     | [11]      |
| La <sub>4</sub> Ti <sub>3</sub> O <sub>12</sub>                                       | Rhombohedral <i>C<sub>3</sub>-R</i>             | 1.00370                 | 56.9296    | [12]      |

**Table S6.** Spectroscopic parameters and calculated  $\beta_1$  values of  $\text{Mn}^{4+}$  ions in various hosts.

| Host                                                                                  | Dq (cm <sup>-1</sup> ) | B (cm <sup>-1</sup> ) | C (cm <sup>-1</sup> ) | $\beta_1$ | E( <sup>2</sup> E <sub>g</sub> ) (cm <sup>-1</sup> ) | Ref.      |
|---------------------------------------------------------------------------------------|------------------------|-----------------------|-----------------------|-----------|------------------------------------------------------|-----------|
| 3.5MgO·0.5MgF <sub>2</sub> ·GeO <sub>2</sub>                                          | 2381                   | 700                   | 3416                  | 0.997     | 15,151                                               | [13]      |
| BaSiF <sub>6</sub>                                                                    | 2128                   | 568                   | 3879                  | 1.025     | 16,048                                               | [14]      |
| Na <sub>2</sub> SiF <sub>6</sub>                                                      | 1970                   | 775                   | 3490                  | 1.051     | 16,210                                               | [15]      |
| K <sub>2</sub> GeF <sub>6</sub>                                                       | 2123                   | 590                   | 3831                  | 1.025     | 16,050                                               | [16]      |
| K <sub>2</sub> SiF <sub>6</sub>                                                       | 2030                   | 770                   | 3470                  | 1.044     | 15,873                                               | [17]      |
| LiAl <sub>5</sub> O <sub>8</sub>                                                      | 2014                   | 725                   | 2900                  | 0.92      | 13,977                                               | [18]      |
| NaLaMgTeO <sub>6</sub>                                                                | 2008                   | 790                   | 2949                  | 0.966     | 14,676                                               | [19]      |
| LiGa <sub>5</sub> O <sub>8</sub>                                                      | –                      | 653                   | 3289                  | 0.949     | 14,724                                               | [20]      |
| SrTiO <sub>3</sub>                                                                    | 1818                   | 719                   | 2839                  | 0.905     | 13,827                                               | [21]      |
| Ba <sub>2</sub> LaNbO <sub>6</sub>                                                    | 1780                   | 670                   | 3290                  | 0.958     | 14,679                                               | [22,23]   |
| LaAlO <sub>3</sub>                                                                    | 2123                   | 700                   | 2941                  | 0.912     | 14,045                                               | [24]      |
| Zn <sub>2</sub> TiO <sub>4</sub>                                                      | 2156                   | 691                   | 3198                  | 0.952     | 14,815                                               | [25]      |
| Mg <sub>2</sub> TiO <sub>4</sub>                                                      | 2096                   | 700                   | 3348                  | 0.985     | 15,267                                               | [26]      |
| CaZrO <sub>3</sub>                                                                    | 1850                   | 754                   | 3173                  | 0.983     | 15,054                                               | [27]      |
| Sr <sub>4</sub> Al <sub>14</sub> O <sub>25</sub>                                      | 2222                   | 790                   | 3192                  | 1.007     | 15,337                                               | [28]      |
| CaAl <sub>12</sub> O <sub>19</sub>                                                    | 2146                   | 750                   | 3245                  | 0.993     | 15,243                                               | [29]      |
| SrMgAl <sub>10</sub> O <sub>17</sub>                                                  | 2237                   | 791                   | 3084                  | 0.989     | 15,152                                               | [30]      |
| Y <sub>2</sub> Sn <sub>2</sub> O <sub>7</sub>                                         | 2100                   | 700                   | 3515                  | 1.016     | 15,563                                               | [31]      |
| Y <sub>3</sub> Ga <sub>5</sub> O <sub>12</sub>                                        | 1922                   | 699                   | 3197                  | 0.957     | 14,859                                               | [25]      |
| Mg <sub>14</sub> Ge <sub>5</sub> O <sub>24</sub>                                      | 2375                   | 709                   | 3263                  | 0.974     | 15,175                                               | [25]      |
| YAl <sub>3</sub> (BO <sub>3</sub> ) <sub>4</sub>                                      | 1890                   | 755                   | 3015                  | 0.956     | 14,620                                               | [32]      |
| Li <sub>2</sub> MgTiO <sub>4</sub>                                                    | 2101                   | 724                   | 3122                  | 0.957     | 14,793                                               | [33]      |
| SrGe <sub>4</sub> O <sub>9</sub>                                                      | 2362                   | 832                   | 3024                  | 1.004     | 15,267                                               | [25]      |
| Gd <sub>2</sub> ZnTiO <sub>6</sub>                                                    | 2041                   | 794                   | 2783                  | 0.924     | 14,205                                               | [34]      |
| Mg <sub>3</sub> Ga <sub>2</sub> SnO <sub>8</sub>                                      | 2033                   | 847                   | 2846                  | 0.99      | 14,706                                               | [35]      |
| BaLaMgNbO <sub>6</sub>                                                                | 1923                   | 736                   | 2944                  | 0.93      | 14,286                                               | [36]      |
| Ba <sub>3</sub> Ca <sub>4</sub> (BO <sub>3</sub> ) <sub>3</sub> (SiO <sub>4</sub> )Cl | 2128                   | 567                   | 2958                  | 0.843     | 13,228                                               | This work |

**Table S7.** The device performance of BCBSC:0.01Mn<sup>4+</sup> NIR pc-LED excited by 365 nm n-UV chip.

| Current (mA) | Voltage (V) | Input power (mW) | Output power (mW) |
|--------------|-------------|------------------|-------------------|
| 10           | 3.192       | 31.92            | 0.6813            |
| 20           | 3.234       | 64.36            | 1.665             |
| 30           | 3.261       | 97.51            | 2.667             |
| 40           | 3.282       | 130.9            | 3.604             |
| 50           | 3.3         | 164.6            | 4.481             |
| 60           | 3.314       | 198.5            | 5.253             |
| 70           | 3.327       | 232.5            | 5.911             |
| 80           | 3.339       | 266.7            | 6.531             |
| 90           | 3.349       | 301.1            | 6.998             |
| 100          | 3.359       | 335.5            | 7.408             |
| 110          | 3.369       | 370.3            | 7.818             |
| 120          | 3.377       | 404.9            | 8.018             |
| 130          | 3.385       | 439.8            | 8.203             |



**Table S8.** The device performance of BCBSC:0.01Mn<sup>4+</sup> NIR pc-LED excited by 460 nm blue chip.

| Current (mA) | Voltage (V) | Input power (mW) | Output power (mW) |
|--------------|-------------|------------------|-------------------|
| 10           | 2.623       | 26.23            | 1.801             |
| 20           | 2.667       | 53.07            | 3.391             |
| 30           | 2.702       | 80.78            | 4.764             |
| 40           | 2.732       | 109              | 5.904             |
| 50           | 2.76        | 137.7            | 6.827             |
| 60           | 2.786       | 166.9            | 7.624             |
| 70           | 2.811       | 196.5            | 8.215             |
| 80           | 2.836       | 226.6            | 8.706             |
| 90           | 2.859       | 257              | 9.021             |
| 100          | 2.881       | 287.8            | 9.236             |
| 110          | 2.904       | 319.1            | 9.389             |
| 120          | 2.925       | 350.7            | 9.419             |
| 130          | 2.947       | 382.8            | 9.429             |

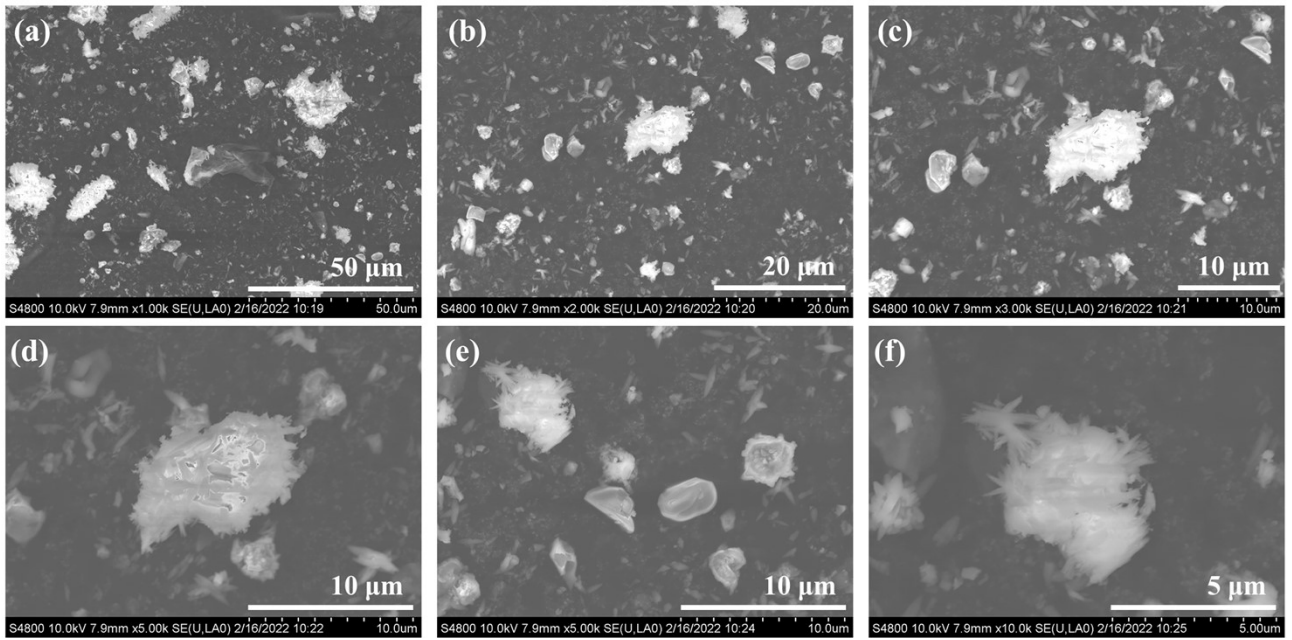

**Fig. S1.** SEM images of BCBSC:0.1Mn<sup>4+</sup> phosphor in different magnification of (a) ×1000, (b) ×2000, (c) ×3000, (d) ×5000, (e) ×5000, and (f) ×10000.

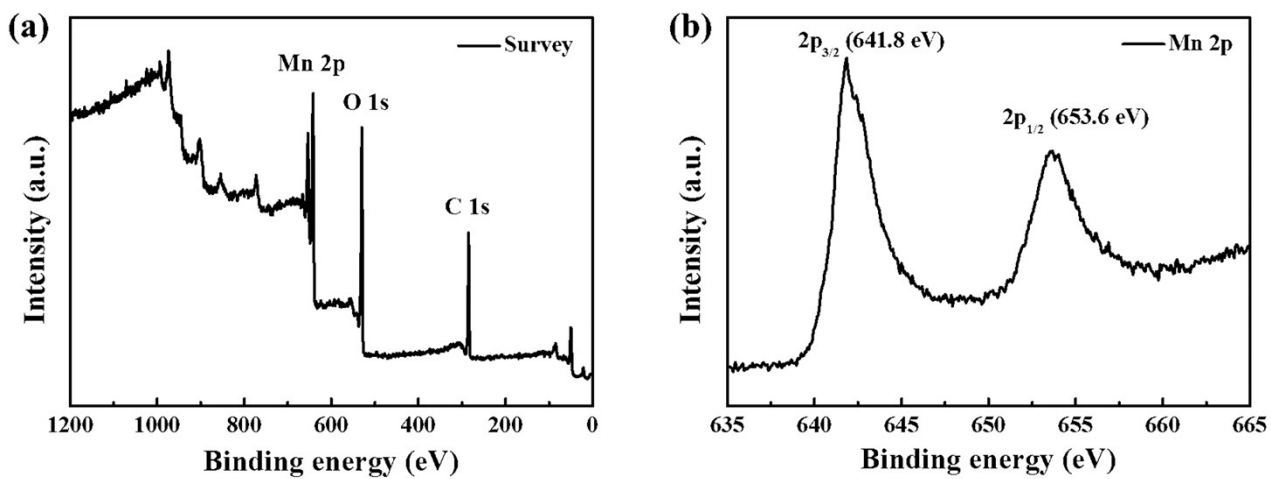

Fig. S2. (a) XPS survey spectrum of MnO<sub>2</sub> standard sample. (b) the magnified Mn 2p spectrum.

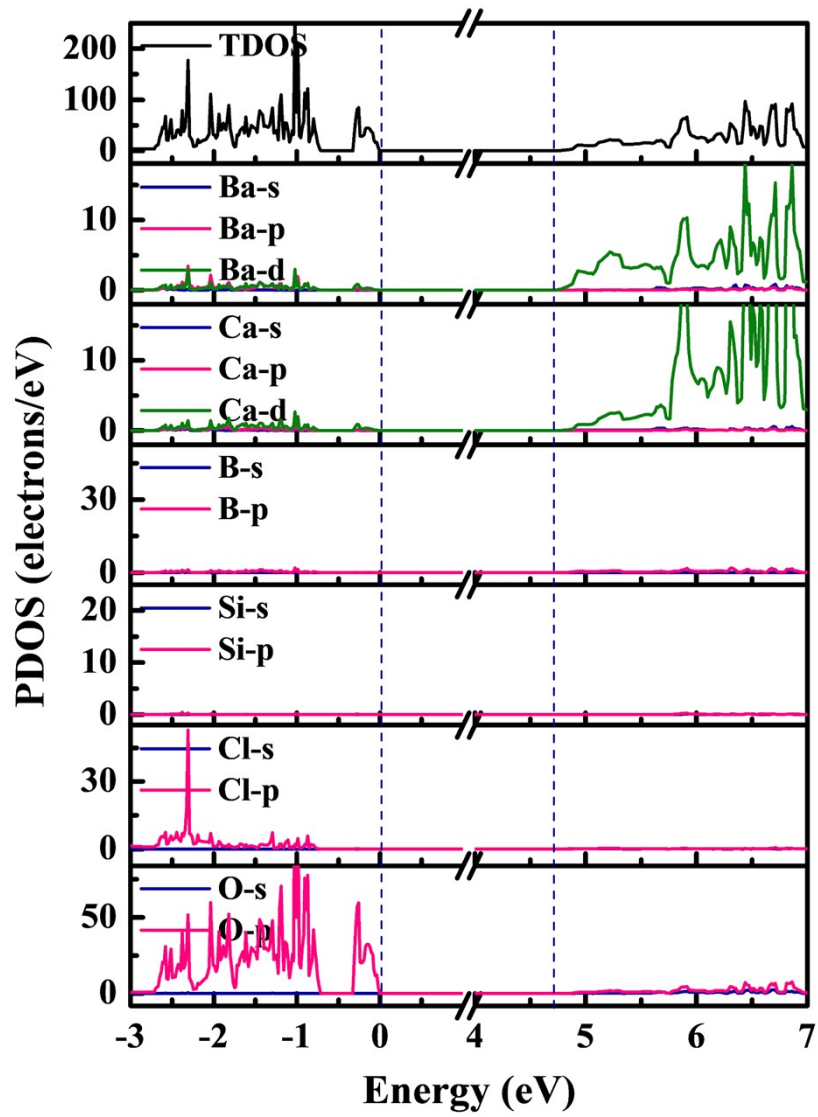

**Fig. S3.** The local magnification PDOS of BCBSC.

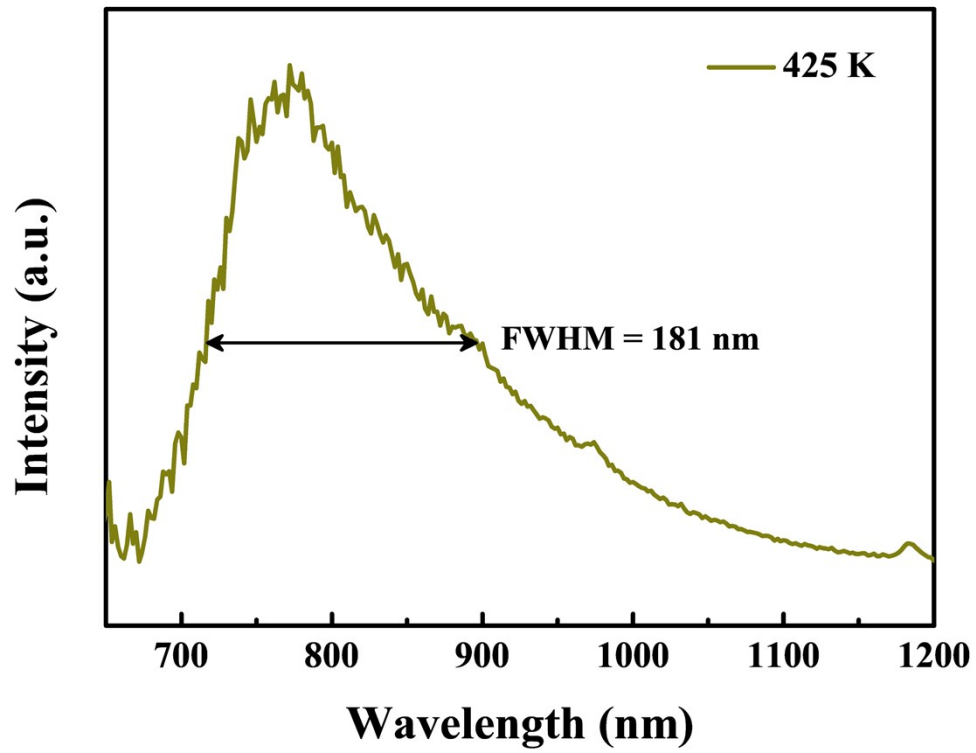

**Fig. S4.** The PL spectrum of the BCBSC:0.1Mn<sup>4+</sup> phosphor measured at 425 K.

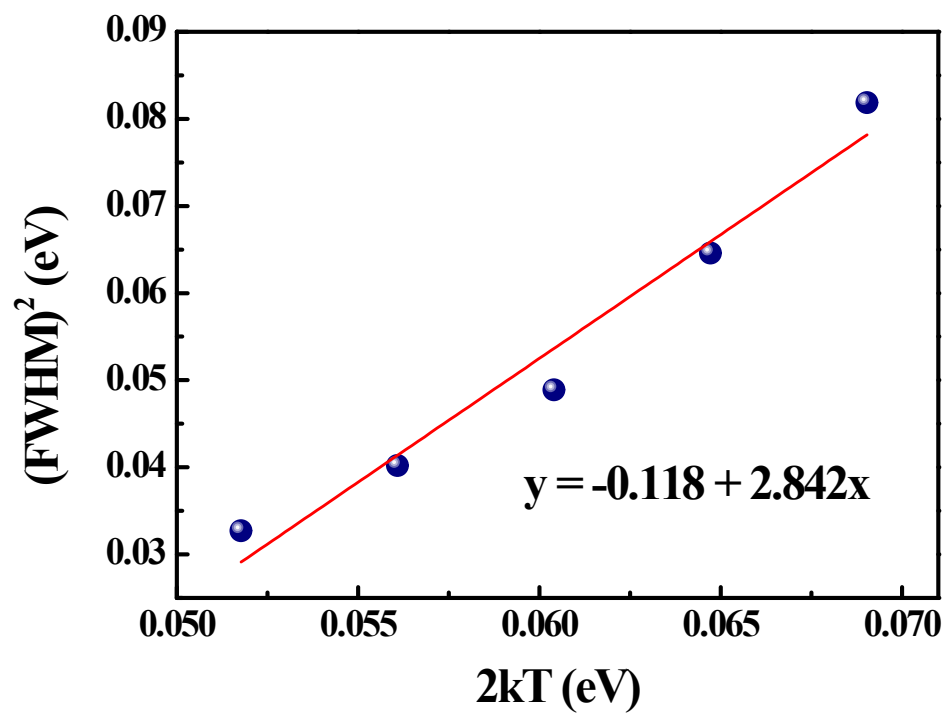

**Fig. S5.** Fitting results of square of full width at half maximum ( $FWHM^2$ ) as a function of  $2kT$ .

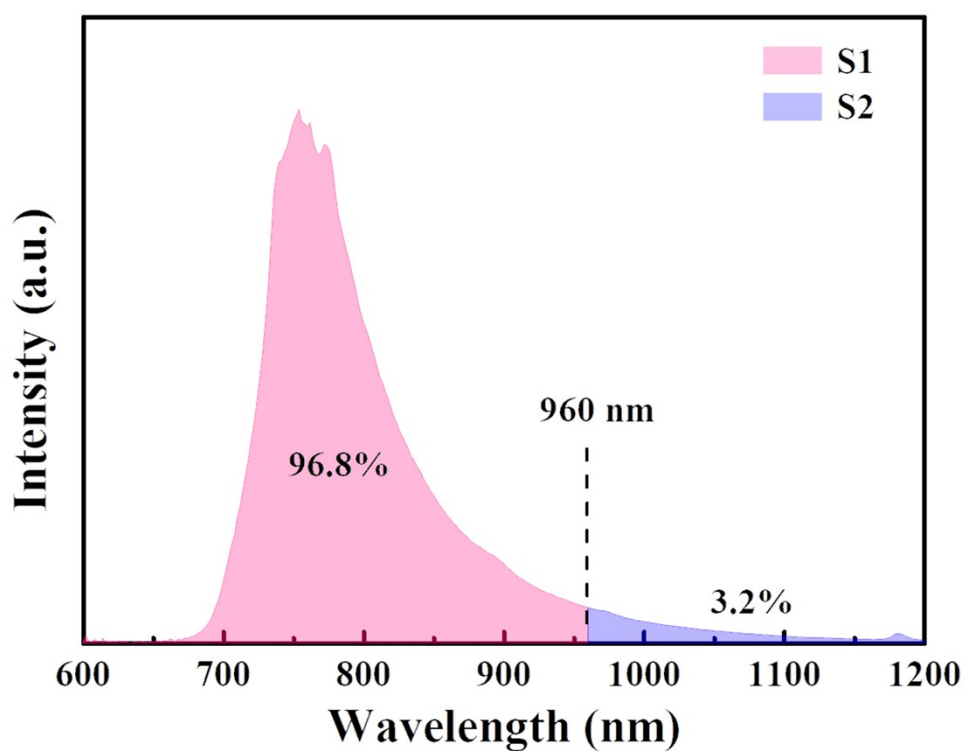

**Fig. S6.** The integral area of the PL spectrum of the BCBSC:0.1Mn<sup>4+</sup> phosphor in the range of 600–960 nm and 960–1200 nm, respectively.

## Supplementary Note

### Computational Detail

Based on density functional theory (DFT), the band structure and electronic structure were calculated by Vienna ab initio simulation package (VASP) codes. The exchange correlation potential was approximated by generalized gradient approximation (GGA) using the Perdew–Burke–Ernzerhof (PBE) formulation. We used the projected augmented wave (PAW) potentials to describe the ionic cores. The plane wave basis set with a kinetic energy cutoff of 450 eV and we used  $2 \times 2 \times 2$  for the Monkhorst-Pack k-point for sampling the Brillouin zone during the whole computations. Partial occupancies of the Kohn–Sham orbitals were allowed using the Gaussian smearing method and a width of 0.05 eV. The electronic energy was considered to be self-consistent when the energy change was less than  $10^{-5}$  eV. The geometric optimization was considered convergent when the force change was less than 0.02 eV/Å.



## References

1. R. Cao, Z. Shi, G. Quan, Z. Luo, P. Tang, H. Ao and X. Yu,  $\text{Li}_3\text{Mg}_2\text{NbO}_6:\text{Mn}^{4+}$  red phosphor for light-emitting diode: Synthesis and luminescence properties, *Opt. Mater.*, 2016, **57**, 212-216.
2. H. G. Xiang, Chongfeng Far red and near infrared double-wavelength emitting phosphor  $\text{Gd}_2\text{ZnTiO}_6:\text{Mn}^{4+}, \text{Yb}^{3+}$  for plant cultivation LEDs, *Dyes Pigments*, 2018, **154**.
3. Y. H. Jin, Yihua; Wu, Haoyi; Duan, He; Chen, Li; Fu, Yinrong; Ju, Guifang; Mu, Zhongfei; He, Miao, A deep red phosphor  $\text{Li}_2\text{MgTiO}_4:\text{Mn}^{4+}$  exhibiting abnormal emission: Potential application as color converter for warm w-LEDs, *Chem. Eng. J.*, 2016, **288**, 596-607.
4. D. K. Amarasinghe and F. A. Rabuffetti, Bandshift Luminescence Thermometry Using  $\text{Mn}^{4+}:\text{Na}_4\text{Mg}(\text{WO}_4)_3$  Phosphors, *Chem. Mater.*, 2019, **31**.
5. W. Li, L. Sun, B. Devakumar, N. Ma and X. Huang, Synthesis, crystal structure and photoluminescence properties of novel far-red-emitting  $\text{SrLaZnSbO}_6:\text{Mn}^{4+}$  double-perovskite phosphors for plant cultivation LEDs, *J. Photoch. Photobio. A*, 2021, **410**, 113166.
6. Q. W. Sun, Shaoying; Devakumar, Balaji; Li, Bin; Huang, Xiaoyong Novel far-red-emitting  $\text{SrGdAlO}_4:\text{Mn}^{4+}$  phosphors with excellent responsiveness to phytochrome PFR for plant growth lighting, *RSC Adv.*, 2018, **8**, 39307-39313.
7. X. L. Huang, Jia; Li, Bin; Sun, Liangling; Lin, Jun High-efficiency and thermally stable far-red-emitting  $\text{NaLaMgWO}_6:\text{Mn}^{4+}$  phosphors for indoor plant growth light-emitting diodes, *Opt. lett.*, 2018, **43**.
8. R. D. Shannon, Revised Effective Ionic Radii and Systematic Studies of Interatomic Distances in Halides and Chalcogenides, *Acta Crystallogr. Sect.*, 1976, **32**, 751-767.
9. T. L. Hu, Hang; Cheng, Yao; Huang, Qingming; Xu, Ju; Gao, Yan; Wang, Jiaomei; Wang, Yuansheng A highly-distorted octahedron with a  $\text{C}_{2v}$  group symmetry inducing an ultra-intense zero phonon line in  $\text{Mn}^{4+}$ -activated oxyfluoride  $\text{Na}_2\text{WO}_2\text{F}_4$ , *J. Mater. Chem. C*, 2017, **5**, 10524-10532.
10. S. S. N. T. A. Sadao, Synthesis and properties of  $\text{Rb}_2\text{GeF}_6:\text{Mn}^{4+}$  red-emitting phosphors, *Jpn. J. of Appl. Phys.*, 2018, **57**, 22601.
11. A. G. Paulusz, Efficient  $\text{Mn}(\text{IV})$  Emission in Fluorine Coordination, *J. Electrochem. Soc.*,

- 1973, **120**, 942-947.
12. H. Ji, J. Ueda, M. G. Brik, M.-H. Du, D. Chen and S. Tanabe, Intense deep-red zero phonon line emission of  $Mn^{4+}$  in double perovskite  $La_4Ti_3O_{12}$ , *Phys. Chem. Chem. Phys.*, 2019, **21**, 25108-25117.
  13. S. Okamoto and H. Yamamoto, Luminescent-Efficiency Improvement by Alkaline-Earth Fluorides Partially Replacing MgO in  $3.5MgO \cdot 0.5MgF_2 \cdot GeO_2:Mn^{4+}$  Deep-Red Phosphors for Light Emitting Diodes, *J. Electrochem. Soc.*, 2010, **157**, J59.
  14. D. Sekiguchi, J.-i. Nara and S. Adachi, Photoluminescence and Raman scattering spectroscopies of  $BaSiF_6:Mn^{4+}$  red phosphor, *J. Appl. Phys.*, 2013, **113**, 183516.
  15. Y. K. Xu and S. Adachi, Properties of  $Na_2SiF_6:Mn^{4+}$  and  $Na_2GeF_6:Mn^{4+}$  red phosphors synthesized by wet chemical etching, *J. Appl. Phys.*, 2009, **105**, 013525.
  16. L.-L. Wei, C. C. Lin, M.-H. Fang, M. G. Brik, S.-F. Hu, H. Jiao and R.-S. Liu, A low-temperature co-precipitation approach to synthesize fluoride phosphors  $K_2MF_6:Mn^{4+}$  (M = Ge, Si) for white LED applications, *J. Mater. Chem. C*, 2015, **3**, 1655-1660.
  17. T. Takahashi and S. Adachi,  $Mn^{4+}$ -Activated Red Photoluminescence in  $K_2SiF_6$  Phosphor, *J. Electrochem. Soc.*, 2008, **155**, E183.
  18. W. M. Yen, *Phosphor handbook*, CRC Press, 2006.
  19. A. M. Srivastava, M. G. Brik, S. J. Camardello, H. A. Comanzo and F. Garcia-Santamaria, Optical Spectroscopy and Crystal Field Studies of the  $Mn^{4+}$  Ion ( $3d^3$ ) in the Double Perovskite  $NaLaMgTeO_6$ , *Z. Naturforsch. B*, 2014, **69**, 141-149.
  20. M. G. Ciresan, M. L. Stanciu and N. M. Avram, Calculation of Optical and Spin-Hamiltonian Parameters for  $Mn^{4+}$  Doped in  $LiGa_5O_8$ , *Acta Phys. Pol.*, 2009, **116**, 547.
  21. Z. Brykhar, V. Trepakov, Z. Potůček and L. Jastrabík, Luminescence spectra of  $SrTiO_3:Mn^{4+}$ , *J. Lumin.*, 2000, **87**, 605-607.
  22. P. A. Tanner and Z. Pan, Luminescence Properties of Lanthanide and Transition Metal Ion-Doped  $Ba_2LaNbO_6$ : Detection of  $MnO_6^{8-}$  and  $CrO_6^{9-}$  Clusters, *Inorg. Chem.*, 2009, **48**, 11142-11146.
  23. A. M. Srivastava and M. G. Brik, Ab initio and crystal field studies of the  $Mn^{4+}$ -doped  $Ba_2LaNbO_6$  double-perovskite, *J. Lumin.*, 2012, **132**, 579-584.
  24. M. G. Brik and A. M. Srivastava, On the Optical Properties of the  $Mn^{4+}$  Ion in Solids, *J.*

- Lumin.*, 2013, **133**, 69-72.
25. T. M. Chen and J. T. Luo, Highly saturated red-emitting Mn (IV) activated phosphors and method of fabricating the same *U. S. Pat.*, 2010.
  26. J. Stade, D. Hahn and R. Dittmann, New aspects of the luminescence of magnesiumtitanate part II: Activation with manganese, *J. Lumin.*, 1974, **8**, 318-325.
  27. M. Brik and A. Srivastava, Electronic energy levels of the Mn<sup>4+</sup> ion in the perovskite, CaZrO<sub>3</sub>, *J. Solid State Sc.*, 2013, **2**, R148-R152.
  28. M. Peng, X. Yin, P. A. Tanner, M. G. Brik and P. Li, Site Occupancy Preference, Enhancement Mechanism, and Thermal Resistance of Mn<sup>4+</sup> Red Luminescence in Sr<sub>4</sub>Al<sub>14</sub>O<sub>25</sub>: Mn<sup>4+</sup> for Warm WLEDs, *Chem. Mater.*, 2015, **27**, 2938-2945.
  29. M. G. Brik, Y. X. Pan and G. K. Liu, Spectroscopic and crystal field analysis of absorption and photoluminescence properties of red phosphor CaAl<sub>12</sub>O<sub>19</sub>:Mn<sup>4+</sup> modified by MgO, *J. Alloy. Compd.*, 2011, **509**, 1452-1456.
  30. L. Meng, L. Liang and Y. Wen, Deep red phosphors SrMgAl<sub>10</sub>O<sub>17</sub>:Mn<sup>4+</sup>, M (M = Li<sup>+</sup>, Na<sup>+</sup>, K<sup>+</sup>, Cl<sup>-</sup>) for warm white light emitting diodes, *J. Mater. Sci.-Mater. El.*, 2014, **25**, 2676-2681.
  31. M. G. Brik and A. M. Srivastava, Comparative crystal field analysis of energy level schemes and nephelauxetic effect for Cr<sup>4+</sup>, Cr<sup>3+</sup>, and Mn<sup>4+</sup> ions in Y<sub>2</sub>Sn<sub>2</sub>O<sub>7</sub> pyrochlore, *Opt. Mater.*, 2013, **35**, 1251-1256.
  32. A. S. Aleksandrovsky, I. A. Gudim, A. S. Krylov and V. L. Temerov, Luminescence of yttrium aluminum borate single crystals doped with manganese, *Phys. Solid State*, 2007, **49**, 1695-1699.
  33. Y. Jin, Y. Hu, H. Wu, H. Duan, L. Chen, Y. Fu, G. Ju, Z. Mu and M. He, A Deep Red Phosphor Li<sub>2</sub>MgTiO<sub>4</sub>:Mn<sup>4+</sup> Exhibiting Abnormal Emission: Potential Application as Color Converter for Warm w-LEDs, *Chem. Eng. J.*, 2016, **288**, 596-607.
  34. J. Xiang, J. Chen, N. Zhang, H. Yao and C. Guo, Far Red and Near Infrared Double-Wavelength Emitting Phosphor Gd<sub>2</sub>ZnTiO<sub>6</sub>: Mn<sup>4+</sup>, Yb<sup>3+</sup> for Plant Cultivation LEDs, *Dyes and Pigments*, 2018, **154**, 257-262.
  35. Q. Zhu, J. Huo, Y. Lin, M. Li, W. Liu, J. Gao and Q. Wang, A New Co-Substitution Strategy as a Model to Study a Rare-Earth-Free Spinel-Type Phosphor with Red Emissions

and Its Application in Light-Emitting Diodes, *Inorg. Chem.*, 2020, **59**, 433-442.

36. Q. Sun, S. Wang, B. Devakumar, B. Li, L. Sun, J. Liang and X. Huang, Synthesis and Photoluminescence Properties of Novel Far-Red-Emitting BaLaMgNbO<sub>6</sub>:Mn<sup>4+</sup> Phosphors for Plant Growth LEDs, *RSC Adv.*, 2018, **8**, 28538-28545.
